# Supplementary material for: HIV testing in termination of pregnancy and colposcopy services: a scoping review
Source: HighWire-hosted journal article supplement (doi:10.1136/sextrans-2021-055111), 2021-09-20
Supplement: sextrans-2021-055111supp001_data_supplement.pdf [file sextrans-2021-055111supp001_data_supplement.pdf]

| HIV testing guidance by society or organisation                               | Region         | HIV testing explicitly proposed | Comment                                                                |
|-------------------------------------------------------------------------------|----------------|---------------------------------|------------------------------------------------------------------------|
| <b>Termination of pregnancy</b>                                               |                |                                 |                                                                        |
| British HIV Association (BHIVA) <sup>1,2</sup>                                | United Kingdom | Yes                             | First published 2008 (Last update: 2020)                               |
| National Institute for Clinical Excellence (NICE) <sup>3,4</sup>              | United Kingdom | Yes                             | First published 2011 (Last update: 2016)                               |
| British Royal College of Obstetricians and Gynaecologists (RCOG) <sup>5</sup> | United Kingdom | No                              | HIV testing protocols delegated to local providers (Last update: 2011) |
| Swiss Federal Office of Public Health (FOPH) <sup>6</sup>                     | Switzerland    | No                              | Last update: 2015                                                      |
| European Centre for Disease Prevention and Control (ECDC) <sup>7</sup>        | Europe         | No                              | Last update: 2018                                                      |
| EuroTEST Guidance (HIV Indicator Conditions) <sup>8</sup>                     | Europe         | No                              | Accessed 2021                                                          |
| <b>Cervical cancer / dysplasia</b>                                            |                |                                 |                                                                        |
| Swiss Society of Gynaecology and Obstetrics <sup>9</sup>                      | Switzerland    | No                              | Last update: 2009                                                      |
| European Society of Gynaecological Oncology <sup>10</sup>                     | Europe         | No                              | Last update: 2020                                                      |

**Supplementary Table 1. HIV testing guidance in termination of pregnancy services by society or organisation.**

Created by the authors

## References

1. British HIV Association. UK National Guidelines for HIV Testing 2008. <https://www.bhiva.org/file/RHNUJgIseDaML/GlinesHIVTest08.pdf> [accessed March 15, 2021].
2. Palfreeman A, Sullivan A, Rayment M, et al. British HIV Association/British Association for Sexual Health and HIV/British Infection Association adult HIV testing guidelines 2020. *HIV Med* 2020;21 Suppl 6:1-26.
3. National Institute for Health and Clinical Excellence. PH33 Increasing the Uptake of HIV Testing Among Black Africans in England: Guidance. 2011.
4. National Institute for Health and Clinical Excellence. HIV testing: increasing uptake among people who may have undiagnosed HIV. 2016. <https://www.nice.org.uk/guidance/ng60/chapter/Recommendations> [accessed February 1, 2021].
5. Royal College of Obstetricians and Gynaecologists. The Care of Women Requesting Induced Abortion. 2011. [https://www.rcog.org.uk/globalassets/documents/guidelines/abortion-guideline\\_web\\_1.pdf](https://www.rcog.org.uk/globalassets/documents/guidelines/abortion-guideline_web_1.pdf) [accessed February 1, 2021].
6. Office fédéral de la santé publique: Dépistage du VIH effectué sur l'initiative des médecins. *Bulletin de l'OFSP*. 2015;21:237-41.
7. European Centre for Disease Prevention and Control. Public health guidance on HIV, hepatitis B and C testing in the EU/EEA. 2018. [https://www.ecdc.europa.eu/sites/default/files/documents/hiv-hep-testing-guidance\\_0.pdf](https://www.ecdc.europa.eu/sites/default/files/documents/hiv-hep-testing-guidance_0.pdf) [accessed February 1, 2021].
8. EuroTEST. HIV Indicator Conditions: Guidance for Implementing HIV Testing in Adults in Health Care Settings. <https://www.eurotest.org/Portals/0/Guidance.pdf.pdf> [accessed March 15, 2021].
9. Swiss Society of Gynaecology and Obstetrics. Manuel pour un entretien de conseil avant interruption de grossesse. 2009. [https://www.sggg.ch/fileadmin/user\\_upload/Dokumente/3\\_Fachinformationen/2\\_Guidelines/Fr/Manuel\\_pour\\_un\\_entretien\\_de\\_conseil\\_avant\\_interruption\\_de\\_grossesse.pdf](https://www.sggg.ch/fileadmin/user_upload/Dokumente/3_Fachinformationen/2_Guidelines/Fr/Manuel_pour_un_entretien_de_conseil_avant_interruption_de_grossesse.pdf).
10. Cibula D, Planchamp F, Fischerova D, et al. European Society of Gynaecological Oncology quality indicators for surgical treatment of cervical cancer. *Int J Gynecol Cancer* 2020;30:3-14.
